# Supplementary material for: Towards a GDPR-compliant cloud architecture with data privacy controlled through sticky policies
Source: PeerJ journal article supplement (doi:10.7717/peerj-cs.1898), 2024-03-29
Supplement: appendix.pdf [file appendix.pdf]

1234

## A COMPLETE ARCHITECTURAL MODEL

1235

1236

1237

1238

1239

1240

1241

1242

1243

1244

1245

1246

Figure A.1 shows, the *DataCenterElement* data type is included to represent a set of data centers with the same configuration. Likewise, the *RackElement* for racks. The profile definition includes the attributes necessary for the *component* stereotypes to simulate different system component specifications, such as the number of cores in a CPU or machines per board in a rack (*machinesPerBoard*). As can be seen, each *DataCenter* is composed of a set of *RackElements*, which contains a set of racks. Each *rack* component is defined by specifying the machines per board, the network, and the boards (see *Rack* component). The rack can be dedicated to computing or storage, so two types of racks are defined, namely *ComputingRack* and *StorageRack*, which contain stateless computation machines (*StatelessComputationMachine* stereotype) or stateless storage machines (*SSMProcessor* stereotype), respectively. Each machine is defined in terms of CPU (*CPU* stereotype), memory (*Memory*), and storage (*Storage*). As can be seen in the bottom right of Fig. A.1, the data is associated with the *Storage* stereotype which is an attribute of the machines where it will be stored. Then, it is associated with storage and computation machines.

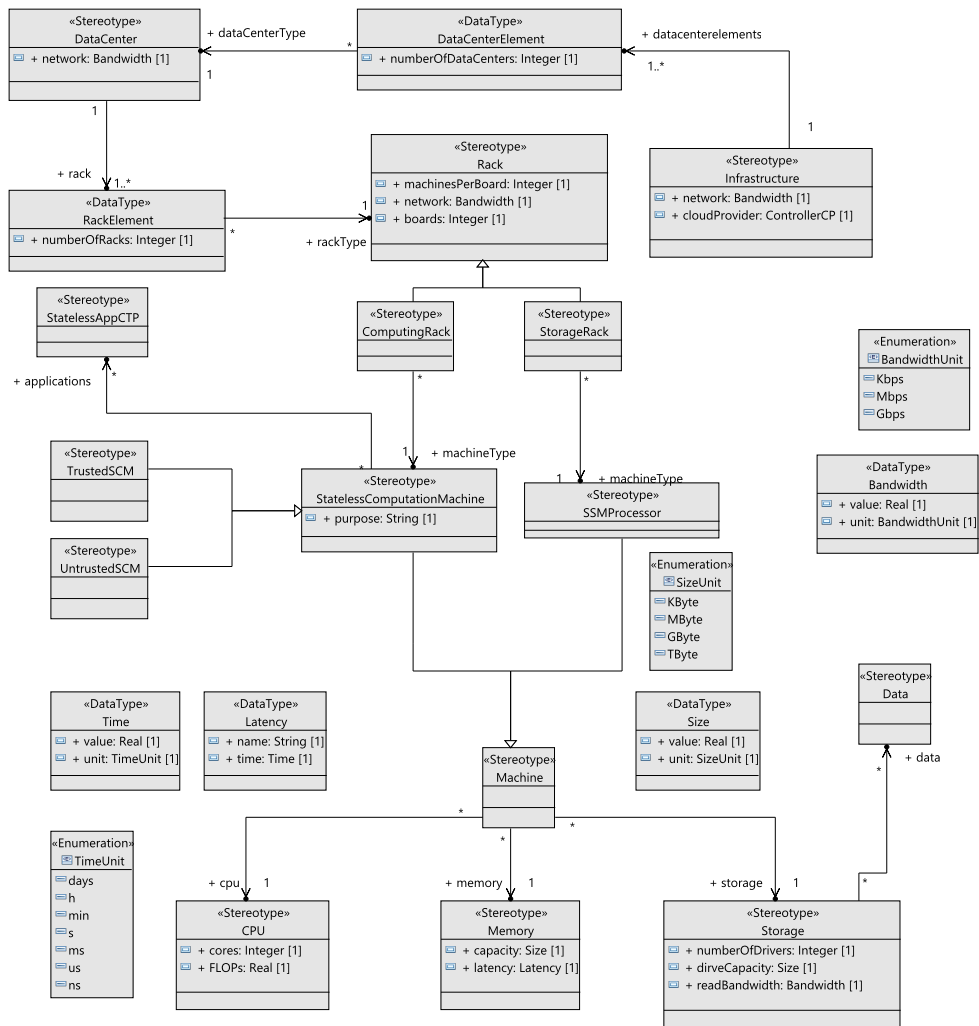

**Figure A.1.** Model4.DataCTrack profile: Associations and Properties of cloud-GDPR infrastructure stereotypes.

1247

1248

1249

1250

1251

It has been necessary to define some new data and specific enumeration types. The data types created are *Time* and *Latency* (see the left part of Figure A.1), and *Size* and *Bandwidth* (right part). *Time*, *Size*, and *Bandwidth* consist of a value and a unit belonging to the *TimeUnit* enumerations, indicating that this time can be measured in days, hours (h), minutes (min), seconds (s), milliseconds (ms), microseconds ( $\mu$ s), or nanoseconds (ns) (left part of the figure). *SizeUnit* can be measured in Kilobytes, Megabytes,

1252 Gigabytes, or Terabytes (right part). *Latency* requires a name of type string and an attribute of type *Time*.  
1253 Finally, the remaining attributes consist of primitive data types, mainly integer and string, except for the  
1254 *cloudProvider* attribute of the *Infrastructure* stereotype of type *ControllerCP* defined for the interaction.  
1255 All these must be parameterized when defining the model.

1256 Figure A.2 shows the attributes and the relationships between the interaction stereotypes as associations  
1257 of stereotypes. Other than the relationships between *User* and *Data*, *ControllerCP* and *Data*, and  
1258 *SSMProcessor* and *StatelessAppCTP*, which are regular binary relationships, all other associations model  
1259 the ownership of the (opposite) end of the association. This association means that the stereotype  
1260 connected by the dotted arrow will become an attribute of the stereotype associated with it (the former is  
1261 owned by the latter). Therefore, most attributes are specified by another stereotype or user-defined data  
1262 types, as illustrated by the *StickyPolicy* stereotype. This stereotype is made up of the following attributes:  
1263 *permission*, *owners*, *purpose*, *controller*, and *accesshistory*. The *permission* attribute is required for  
1264 defining restrictions (permissions) on data usage. This attribute is of the *PermissionPerTP* data type,  
1265 which is used to define who is authorized to grant permissions for data access (*S*), and who has obtained  
1266 permission for writing the data (*I*), both being defined as a list of lists of *tps* or *Users*. For this purpose,  
1267 the *Principal* stereotype, which can be a *User* or a *tp*, is defined (see Section 5.2). Then, to create the list  
1268 of lists, it is necessary to create a data type that establishes the first list of principals, i.e., *PList*. Thus, we  
1269 can later define, in *S* and *I*, a list of this type to achieve it. The attribute *owners*, of *PList* type, establishes  
1270 the user (or users in the case of combined data sets), which are data owners of the data which pairs with  
1271 this policy.

1272 Then, the *controller* attribute, of type *ControllerCP*, indicates the data controller of the data. Note that  
1273 no ad-hoc identification is required as data processors usually use segmentation techniques to separate  
1274 data from different data subjects. The *purpose* attribute has been extracted from point 1c of Article 13  
1275 GDPR and contains the required information, detailing the purposes for which the controller of the data  
1276 allows the treatment of its data. Finally, the *accessHistory* attribute<sup>10</sup> of the *AccessPerTP* data type is  
1277 defined to specify all the third parties that access the data, thus allowing us to track the data and obtain  
1278 information about who obtained permission for that access. The *controller* and *owners* attributes, of  
1279 *ControllerCP* and *User* types, respectively, indicate the data controller and the user (or users in case of  
1280 combined data sets) which are data owners.

1281 The *AccessPerTP* stereotype is used in the SP in the *accessHistory* field to track data accesses and  
1282 purpose. It has three attributes: *tp*, *actionPerformed*, and *purpose*. Note that the *purpose* attribute of the  
1283 *StickyPolicy* stereotype must match its contents to model that a third party does not access the data for a  
1284 purpose other than the one stated by the controller.

1285 Another important stereotype is the *AccessLog* stereotype, which represents the log used by the  
1286 controller to control where data is stored and to track data accesses. A new entry will be included in the  
1287 log for each access to the data to capture this. This log has the following attributes: *tp*, *ll* (1 for location),  
1288 *sp*, *O* (for Owners), *action*, *newl*, and *newsp*. The *tp* attribute, of *StatelessAppCTP* type (where AppCTP  
1289 stands for computing application developed by a third party), relates a data access to a third party and  
1290 allows us to know who is responsible for the data access. The *ll* attribute is of *Storage* type and represents  
1291 the current location of the data being accessed. This attribute allows for more complete data tracking  
1292 as it links a data access to a machine. The *sp* attribute, of *StickyPolicy* type, records the initial sticky  
1293 policy for the data treated to detect possible alterations between the input and output data sets. The *O*  
1294 attribute of type list of *Principals* (*PList*) indicates who consents to the data access. The *action* attribute  
1295 is of *ActionType* type and records the operation performed on the data, which can be a read or a write.  
1296 The *newl* attribute, of *Storage* type, specifies the location where the data has been stored after the action  
1297 performed on it. Finally, the last property, namely *newsp*, of type *StickyPolicy*, contains the resulting  
1298 policy on the data after the action. The value of this attribute when data are combined over two sets of  
1299 data is shown in Section 5.2.

1300 The *SLA* stereotype has five attributes that are modeled on the basis of Article 28 GDPR. This stereo-  
1301 type represents the contract that governs data processing, which the controller and processor are required  
1302 to sign, in accordance with point 3 of the above article. The attributes of this stereotype are *subjectMatter*,  
1303 *processingDuration*, *recipients*, *processingNature*, *processingPurpose*, and *processingInstructions*. The  
1304 first two attributes, defined as an array of *strings* and *Time* stereotype, respectively, set the theme and  
1305 duration of the processing. The *recipients* attribute is defined as a list of *StatelessAppCTP* and represents

<sup>10</sup>Note that we have added this property to track user data, but it is generally not considered in the definition of Sticky Policy.

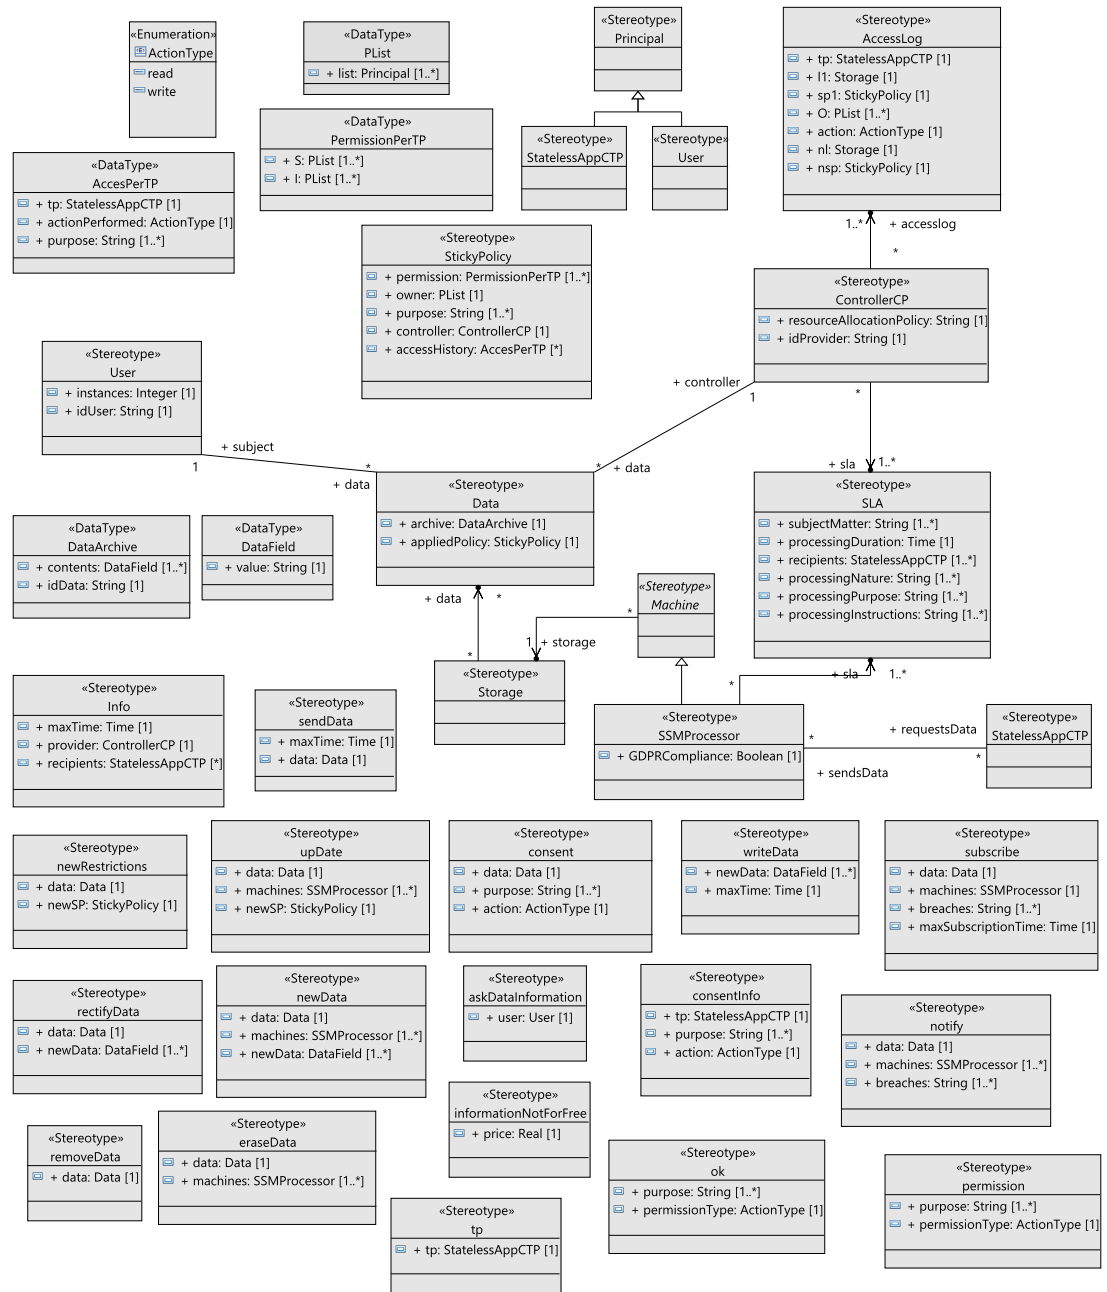

**Figure A.2.** Model4\_DataCTrack profile: Associations and properties of cloud-GDPR interaction stereotypes.

1306 the list of third parties who are allowed to access the data so far. The nature of the treatment and the  
 1307 purpose are the following two attributes, where the latter must match the one indicated in the SP defined  
 1308 by the user and are defined as *string* arrays. Finally, the attribute *processingInstructions* models the set of  
 1309 directions given by the controller to regulate data processing.

1310 The *ControllerCP* stereotype includes two attributes: *resourceAllocationPolicy* and *idProvider*. The  
 1311 first models the type of policy that the controller uses to allocate its resources. The second attribute,  
 1312 defined as a *string* type, models the information about the controller it must include in each contract  
 1313 as *spContact*, which is the cloud service provider. The remaining attributes result from the use of end  
 1314 classifiers in the associations of this stereotype. As stated above, these are represented by an arrow with  
 1315 a dot at one end of an association and indicate that the marked stereotype will be an attribute of the

1316 stereotype at the other end. It is also worth noting that the multiplicity of the end with the dot becomes  
 1317 that of the resulting attribute. Thus, having a multiplicity of one-or-many in the marked stereotype implies  
 1318 that the resulting attribute represents a set of elements of that type. Therefore, *ControllerCP* receives two  
 1319 attributes named *accessLog* and *sla* of *AccessLog* and *SLA* types, respectively.

1320 In contrast, the few primitive type attributes in this diagram are mostly *strings*, as represented by the  
 1321 *ControllerCP* or *SLA* stereotypes.

1322 The *Data* stereotype represents the data that belongs to a certain user or set of users (only in the  
 1323 case of combined data). For this stereotype, it is necessary to include two specific data types, namely  
 1324 *DataArchive* and *DataField*. *DataArchive* models the structure of a data file, being composed of an  
 1325 identifier, *idData*, and its contents, *contents*. The content of an archive consists of a group of fields  
 1326 (*DataField* type), and each one, in turn, contains a value, which is an attribute of *string* type. In addition,  
 1327 the *Data* stereotype includes the sticky policy that is applied to it (*appliedPolicy* attribute). The *Storage*  
 1328 attribute, in turn, is an attribute of *Machine*, which is abstract, so it will be inherited by the *SSMProcessor*  
 1329 and *StatelessComputationMachine* stereotypes. The processors represent the machines that store and  
 1330 maintain the data at all times, although the computing machines will only occasionally store data (provided  
 1331 by a *SSMProcessor*) when processing it via the *StatelessAppCTP* that requested such data.

## 1332 B OCL RULES

| OCL rules     |                                                                                                                                                                                                                       |
|---------------|-----------------------------------------------------------------------------------------------------------------------------------------------------------------------------------------------------------------------|
| <b>Name</b>   | <b>no_empty_racks</b>                                                                                                                                                                                                 |
| Severity      | ERROR                                                                                                                                                                                                                 |
| Context       | Rack                                                                                                                                                                                                                  |
| Description   | This rule validates that attributes <i>machinesPerBoard</i> and <i>boards</i> in stereotype <i>Rack</i> ( <i>self.machinesPerBoard</i> and <i>self.boards</i> ) are both greater than 0 with a logical AND operation. |
| Specification | <code>self.machinesPerBoard&gt;0 and self.boards&gt;0</code>                                                                                                                                                          |
| <b>Name</b>   | <b>cpu_cores_and_flops_greater_than_0</b>                                                                                                                                                                             |
| Severity      | ERROR                                                                                                                                                                                                                 |
| Context       | CPU                                                                                                                                                                                                                   |
| Description   | Similarly to the previous rule this one checks that the number of cores and FLOPs of a CPU are both greater than 0.                                                                                                   |
| Specification | <code>self.cores&gt;0\ and\ self.FLOPs&gt;0</code>                                                                                                                                                                    |
| <b>Name</b>   | <b>latency_name_not_empty</b>                                                                                                                                                                                         |
| Severity      | ERROR                                                                                                                                                                                                                 |
| Context       | Latency                                                                                                                                                                                                               |
| Description   | Validates that the latency's name is not an empty string by checking its size (number of characters) is greater than zero                                                                                             |
| Specification | <code>self.name.size()&gt;0</code>                                                                                                                                                                                    |
| <b>Name</b>   | <b>size_value_greater_than_0</b>                                                                                                                                                                                      |
| Severity      | ERROR                                                                                                                                                                                                                 |
| Context       | Size                                                                                                                                                                                                                  |
| Description   | Assures that the value for any attribute of type <i>Size</i> is greater than 0                                                                                                                                        |
| Specification | <code>self.value&gt;0</code>                                                                                                                                                                                          |
| <b>Name</b>   | <b>time_value_greater_than_0</b>                                                                                                                                                                                      |
| Severity      | ERROR                                                                                                                                                                                                                 |
| Context       | Time                                                                                                                                                                                                                  |
| Description   | Checks that the value of any attribute of type <i>Time</i> ( <i>self.value</i> ) is greater than 0                                                                                                                    |
| Specification | <code>self.value&gt;0</code>                                                                                                                                                                                          |
| <b>Name</b>   | <b>bandwidth_value_greater_than_0</b>                                                                                                                                                                                 |
| Severity      | ERROR                                                                                                                                                                                                                 |
| Context       | Bandwidth                                                                                                                                                                                                             |
| Description   | Checks that the value of any attribute of type <i>bandwidth</i> ( <i>self.value</i> ) is greater than 0                                                                                                               |
| Specification | <code>self.value&gt;0</code>                                                                                                                                                                                          |

| OCL rules     |                                                                                                                                                                                                                                                                                                                                                                                |
|---------------|--------------------------------------------------------------------------------------------------------------------------------------------------------------------------------------------------------------------------------------------------------------------------------------------------------------------------------------------------------------------------------|
| <b>Name</b>   | <b>numberOfDrivers_greater_than_ns</b>                                                                                                                                                                                                                                                                                                                                         |
| Severity      | Error                                                                                                                                                                                                                                                                                                                                                                          |
| Context       | Storage                                                                                                                                                                                                                                                                                                                                                                        |
| Description   | Validates that the value of attribute numberOfDrivers of type Storage (self.numberOfDrivers) is greater than 0                                                                                                                                                                                                                                                                 |
| Specification | <code>self.numberOfDrivers&gt;0</code>                                                                                                                                                                                                                                                                                                                                         |
| <b>Name</b>   | <b>sendData_maxTime_value_greater_than_0</b>                                                                                                                                                                                                                                                                                                                                   |
| Severity      | ERROR                                                                                                                                                                                                                                                                                                                                                                          |
| Context       | sendData                                                                                                                                                                                                                                                                                                                                                                       |
| Description   | This rule checks that the time value for the attribute maxTime of the sendData message is greater than 0                                                                                                                                                                                                                                                                       |
| Specification | <code>self.maxTime.value&gt;0</code>                                                                                                                                                                                                                                                                                                                                           |
| <b>Name</b>   | <b>paste_maxTime_value_greater_than_0</b>                                                                                                                                                                                                                                                                                                                                      |
| Severity      | ERROR                                                                                                                                                                                                                                                                                                                                                                          |
| Context       | pasteData                                                                                                                                                                                                                                                                                                                                                                      |
| Description   | This rule assures that the value of the maxTime attribute of pasteData stereotypes is a number greater than zero                                                                                                                                                                                                                                                               |
| Specification | <code>self.maxTime.value&gt;0</code>                                                                                                                                                                                                                                                                                                                                           |
| <b>Name</b>   | <b>combine_maxTime_value_greater_than_0</b>                                                                                                                                                                                                                                                                                                                                    |
| Severity      | ERROR                                                                                                                                                                                                                                                                                                                                                                          |
| Context       | combineData                                                                                                                                                                                                                                                                                                                                                                    |
| Description   | This rule checks that the time value for the attribute maxTime of the combineData message is greater than 0                                                                                                                                                                                                                                                                    |
| Specification | <code>self.maxTime.value&gt;0</code>                                                                                                                                                                                                                                                                                                                                           |
| <b>Name</b>   | <b>maxSubTime_greater_than_0</b>                                                                                                                                                                                                                                                                                                                                               |
| Severity      | ERROR                                                                                                                                                                                                                                                                                                                                                                          |
| Context       | Subscribe                                                                                                                                                                                                                                                                                                                                                                      |
| Description   | This rule checks that the attribute maxSubscriptionTime in Subscribe type is greater than zero                                                                                                                                                                                                                                                                                 |
| Specification | <code>self.maxSubscriptionTime.value&gt;0</code>                                                                                                                                                                                                                                                                                                                               |
| <b>Name</b>   | <b>machine_contains_data_to_rectify</b>                                                                                                                                                                                                                                                                                                                                        |
| Severity      | ERROR                                                                                                                                                                                                                                                                                                                                                                          |
| Context       | newData                                                                                                                                                                                                                                                                                                                                                                        |
| Description   | Validates that the set of data to rectify with the contents on the message newData is located in all of the machines which the message is destined to. This is achieved by verifying that, for all the machines in the list of the newData message (self.machines), the data included in the message (self.data) is included in every list of data inside the machine (m.data) |
| Specification | <code>self.machines--&gt;forall(m   m.data--&gt;includes(self.data))</code>                                                                                                                                                                                                                                                                                                    |
| <b>Name</b>   | <b>machine_contains_data_to_erase</b>                                                                                                                                                                                                                                                                                                                                          |
| Severity      | ERROR                                                                                                                                                                                                                                                                                                                                                                          |
| Context       | eraseData                                                                                                                                                                                                                                                                                                                                                                      |
| Description   | Similarly to the previous rule, this one checks that the set of data to erase on the message eraseData is located in all of the destination machines of the message.                                                                                                                                                                                                           |
| Specification | <code>self.machines--&gt;forall(m   m.data--&gt;includes(self.data))</code>                                                                                                                                                                                                                                                                                                    |
| <b>Name</b>   | <b>machine_contains_data_to_subscribe_to</b>                                                                                                                                                                                                                                                                                                                                   |
| Severity      | ERROR                                                                                                                                                                                                                                                                                                                                                                          |
| Context       | subscribe                                                                                                                                                                                                                                                                                                                                                                      |
| Description   | Alike the former two rules, this one checks that the set of data which the controller wants to subscribe to is present in all of the destination machines of the message.                                                                                                                                                                                                      |
| Specification | <code>self.machines--&gt;forall(m   m.data--&gt;includes(self.data))</code>                                                                                                                                                                                                                                                                                                    |

| OCL rules                                                              |                                                                                                                                                                                                                                                                                                                                                                                                                                                                                                                                                                                                                                                                                                                                           |
|------------------------------------------------------------------------|-------------------------------------------------------------------------------------------------------------------------------------------------------------------------------------------------------------------------------------------------------------------------------------------------------------------------------------------------------------------------------------------------------------------------------------------------------------------------------------------------------------------------------------------------------------------------------------------------------------------------------------------------------------------------------------------------------------------------------------------|
| <b>Name</b><br>Severity<br>Context<br>Description<br><br>Specification | <b>location1_machine_not_under_sla_with_controller</b><br>ERROR<br>ControllerCP<br>This rule checks that the processor contained in accesslog from which data has been obtained for the operation is under SLA with the controller of said data. To do this it accesses the list of accesslogs of the controller (self.accesslog) and checks, for all of them, that it exists at least one SLA in the controller list which is included in the SLA list of the location1 machine of the log (log.location1.sla)<br><br><pre>self.accesslog--&gt;   forAll(log   self.sla --&gt;     exists(sla   log.location1.sla--&gt;includes(sla)))</pre>                                                                                             |
| <b>Name</b><br>Severity<br>Context<br>Description<br><br>Specification | <b>sourceMachine_not_under_sla_with_controller</b><br>ERROR<br>ControllerCP<br>This rule validates that the machine containing the source copy of data is under SLA with the controller. First, it gets the list of SLAs for the controller included inside the sticky policy of the log of the controller (self.accesslog.sp.controller.sla), then it checks that it exists (exists operation) at least one sla in said list which is included (includes operation) in the list of SLAs in the source machine contained in the same sticky policy of the log (self.accesslog.sp.sourceMachine.sla)<br><br><pre>self.accesslog.sp.controller.sla --&gt;   exists(sla   self.accesslog.sp.sourceMachine.sla--&gt;     includes(sla))</pre> |
| <b>Name</b><br>Severity<br>Context<br>Description<br><br>Specification | <b>duplicatesMachine_not_under_sla_with_controller</b><br>ERROR<br>ControllerCP<br>This rule validates that the machine containing the source copy of data is under SLA with the controller. First it gets the list of SLAs for the<br><br><pre>self.accesslog.sp.duplicates -&gt;   forAll(m   self.accesslog.sp.controller.sla -&gt;     exists(sla   m.sla-&gt;includes(sla)))</pre>                                                                                                                                                                                                                                                                                                                                                   |
| <b>Name</b><br>Severity<br>Context<br>Description<br><br>Specification | <b>cpu_cores_and_flops_greater_than_0</b><br>ERROR<br>CPU<br>Similarly to the previous rule this one checks that the number of cores and FLOPs of a CPU are both greater than 0.<br><pre>self.cores&gt;0 and self.FLOPs&gt;0</pre>                                                                                                                                                                                                                                                                                                                                                                                                                                                                                                        |
| <b>Name</b><br>Severity<br>Context<br>Description<br><br>Specification | <b>latency_name_not_empty</b><br>ERROR<br>Latency<br>Validates that the latency's name is not an empty string by checking its size (number of characters) is greater than zero<br><pre>self.name.size()&gt;0</pre>                                                                                                                                                                                                                                                                                                                                                                                                                                                                                                                        |
| <b>Name</b><br>Severity<br>Context<br>Description<br>Specification     | <b>size_value_greater_than_0</b><br>ERROR<br>Size<br>Assures that the value for any attribute of type Size is greater than 0<br><pre>self.value&gt;0</pre>                                                                                                                                                                                                                                                                                                                                                                                                                                                                                                                                                                                |

| OCL rules                                                                      |                                                                                                                                                                                                                                                                                                                                                                                                                                                                                                                                                                                                                                                                                                                                                                                                                                                                                                                                                                                                                                                                                                             |
|--------------------------------------------------------------------------------|-------------------------------------------------------------------------------------------------------------------------------------------------------------------------------------------------------------------------------------------------------------------------------------------------------------------------------------------------------------------------------------------------------------------------------------------------------------------------------------------------------------------------------------------------------------------------------------------------------------------------------------------------------------------------------------------------------------------------------------------------------------------------------------------------------------------------------------------------------------------------------------------------------------------------------------------------------------------------------------------------------------------------------------------------------------------------------------------------------------|
| <b>Name</b><br>Severity<br>Context<br>Description<br><br><br><br>Specification | <b>accessHistory_tp_not_in_recipients_list</b><br>ERROR<br>ControllerCP<br>In this rule the list of third parties who accessed the data is first accessed, this is done through the sticky policy attribute (sp) of the controller's accesslog (self.accesslog.sp.accessHistory). Then, it is check for all them (forAll operation) that for all the users (second forAll operation) in the list of owners (self.accesslog.sp.owners) the list of recipients of their user contract (ow.bindingContract.recipients) includes the third party in the accessHistory attribute (his.tp). In this way it is ensured that data is not accessed by any tp that the users have not been informed of. Note that this could have been done with StickyPolicy as starting point, but with the additional navigation the error is thrown by the controller which is the entity that would manage this situation in a real scenario.<br><br><pre>self.accesslog.sp.accessHistory--&gt;   forAll(his   self.accesslog.sp.owners--&gt;     forAll(ow   ow.bindingContract.recipients--&gt;       includes(his.tp)))</pre> |
| <b>Name</b><br>Severity<br>Context<br>Description<br><br>Specification         | <b>no_empty_newData_fields</b><br>ERROR<br>newData<br>This rule is meant to ensure that the data introduced in the newData messages does not infringe the data accuracy RGD principle by introducing empty fields. To do this, it is checked that for all the fields in the newData attribute of the message (self.newData), the size (number of characters of the string) is greater than 0<br><pre>self.newData--&gt;forAll(f   f.value.size())&gt;0)</pre>                                                                                                                                                                                                                                                                                                                                                                                                                                                                                                                                                                                                                                               |
| <b>Name</b><br>Severity<br>Context<br>Description<br><br>Specification         | <b>no_empty_write_fields</b><br>ERROR<br>rectifyData<br>Similarly to the previous rule, this one validates that no empty fields are introduced in the write message<br><pre>self.newContent--&gt;forAll(f   f.value.size())&gt;0)</pre>                                                                                                                                                                                                                                                                                                                                                                                                                                                                                                                                                                                                                                                                                                                                                                                                                                                                     |
| <b>Name</b><br>Severity<br>Context<br>Description<br><br>Specification         | <b>sendData_timeunit_not_hours_or_minutes</b><br>WARNING<br>combineData<br>Notes that the units of time for the maximum storage time of data are smaller than usual. The way this is check is the exact same as in the previous rule<br><pre>self.maxTime.unit=TimeUnit::h or self.maxTime.unit=TimeUnit::min</pre>                                                                                                                                                                                                                                                                                                                                                                                                                                                                                                                                                                                                                                                                                                                                                                                         |
| <b>Name</b><br>Severity<br>Context<br>Description<br><br>Specification         | <b>newData_destinatnion_machines_comply_with_GDPR</b><br>ERROR<br>newData<br>This rule ensures that all of the machines included as destinations of a newData message are marked as compliant with the GDPR, just like rule 10 does for upDate.<br><pre>self.machines--&gt;forAll(m   m.GDPRCompliance=true)</pre>                                                                                                                                                                                                                                                                                                                                                                                                                                                                                                                                                                                                                                                                                                                                                                                          |
| <b>Name</b><br>Severity<br>Context<br>Description<br><br>Specification         | <b>eraseData_destinatnion_machines_comply_with_GDPR</b><br>ERROR<br>eraseData<br>This rule checks that the destination machines of an eraseData message comply with the GDPR in the same way that the previous rules.<br><pre>self.machines--&gt;forAll(m   m.GDPRCompliance=true)</pre>                                                                                                                                                                                                                                                                                                                                                                                                                                                                                                                                                                                                                                                                                                                                                                                                                    |
| <b>Name</b><br>Severity<br>Context<br>Description<br><br>Specification         | <b>subscribe_destinatnion_machines_comply_with_GDPR</b><br>ERROR<br>subscribe<br>This rule ensures that all of the machines included as destinations of a subscribe message are marked as compliant with the GDPR.<br><pre>self.machines--&gt;forAll(m   m.GDPRCompliance=true)</pre>                                                                                                                                                                                                                                                                                                                                                                                                                                                                                                                                                                                                                                                                                                                                                                                                                       |

| OCL rules     |                                                                                                                                                                              |
|---------------|------------------------------------------------------------------------------------------------------------------------------------------------------------------------------|
| <b>Name</b>   | <b>notify_destinatnion_machines_comply_with_GDPR</b>                                                                                                                         |
| Severity      | ERROR                                                                                                                                                                        |
| Context       | notify                                                                                                                                                                       |
| Description   | in the same way that the previous rules do it, this rule checks that the destination machines of a notify message comply with the GDPR.                                      |
| Specification | <code>self.machines--&gt;forAll(m   m.GDPRCompliance=true)</code>                                                                                                            |
| <b>Name</b>   | <b>pasteData_machine2_complies_with_GDPR</b>                                                                                                                                 |
| Severity      | ERROR                                                                                                                                                                        |
| Context       | pasteData                                                                                                                                                                    |
| Description   | This rule checks that the machine2 of the pasteData message, in which data is going to be copied, complies with the GDPR standards.                                          |
| Specification | <code>self.machine2.GDPRCompliance=true</code>                                                                                                                               |
| <b>Name</b>   | <b>combineData_machine2_complies_with_GDPR</b>                                                                                                                               |
| Severity      | ERROR                                                                                                                                                                        |
| Context       | combineData                                                                                                                                                                  |
| Description   | This rule checks that the machine2 of a combineData message, in which the data set resulting of a combine operation is going to be stored, complies with the GDPR standards. |
| Specification | <code>self.machine2.GDPRCompliance=true</code>                                                                                                                               |
| <b>Name</b>   | <b>consent_machine_complies_with_GDPR</b>                                                                                                                                    |
| Severity      | ERROR                                                                                                                                                                        |
| Context       | consent                                                                                                                                                                      |
| Description   | This rule checks that the machine of a consent message, which will be accessed by a third party if consent is given, complies with the GDPR standards.                       |
| Specification | <code>self.machine.GDPRCompliance=true</code>                                                                                                                                |
